# Supplementary material for: Lineage tracing using a Cas9-deaminase barcoding system targeting endogenous L1 elements
Source: PubMed Central journal article supplement (PMC6420643; doi:10.1038/s41467-019-09203-z), 2019-03-15
Supplement: 41467_2019_9203_MOESM1_ESM.pdf [file 41467_2019_9203_MOESM1_ESM.pdf]

**Lineage tracing using a Cas9-deaminase barcoding  
system targeting endogenous L1 elements**

Byungjin Hwang et al.

## Supplementary Figures

**Supplementary Figure 1. Schematic overview of the targeted deaminase system.** a) After amplification using a single primer pair, edited C>T substitution patterns were encoded to serve as cell barcodes for lineage reconstruction. b) Distinct regions were targeted using two sgRNAs designed for use in this study.

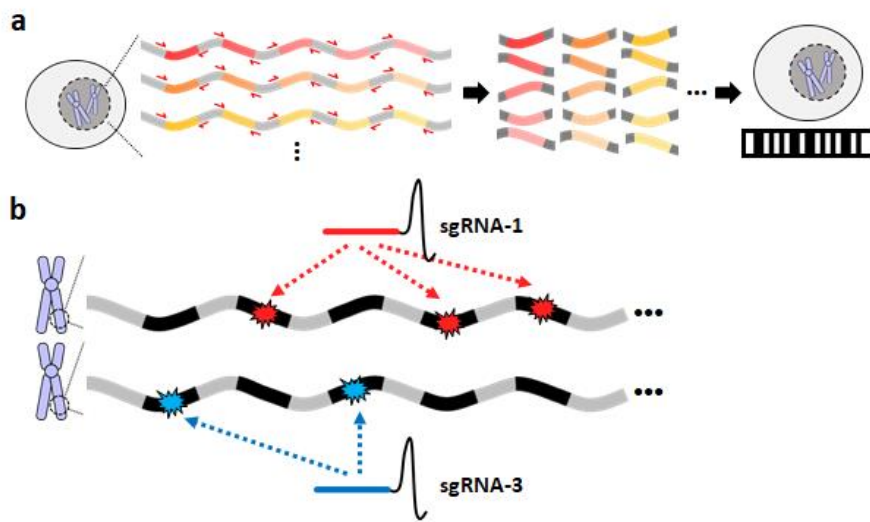

**Supplementary Figure 2. Characterization of the amplified target regions.** A density plot of the amplicon size (measured in fragment length inferred by alignment of the NGS reads) with two distinct peaks (left) and a representative histogram of the L1 retrotransposon subfamily distribution by decreasing order of counts (right).

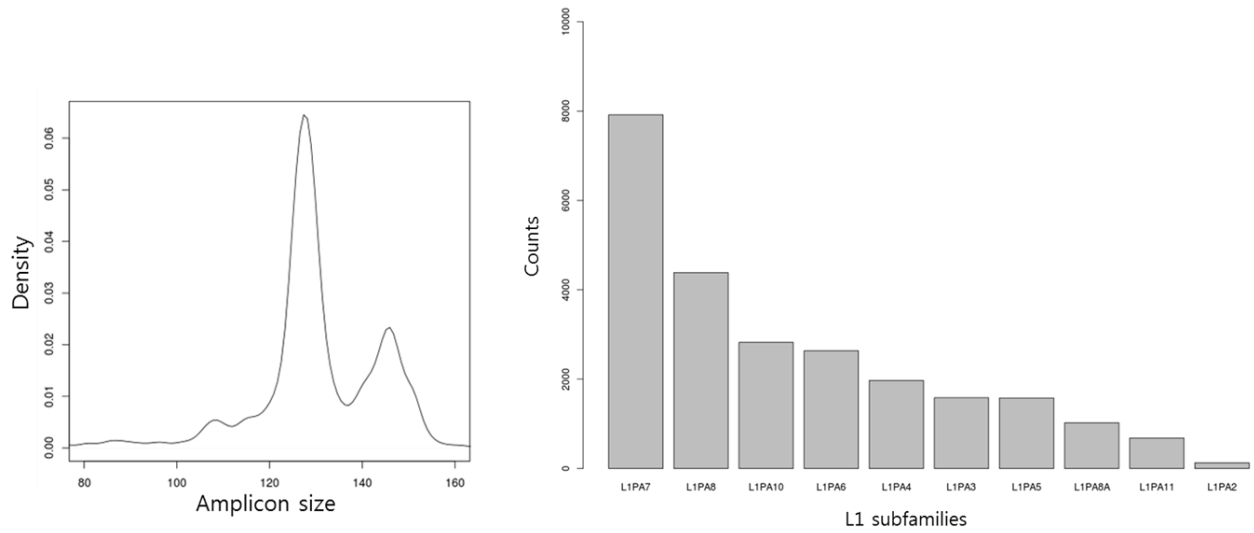

**Supplementary Figure 3. Top 10 candidate sgRNAs in the targeted regions.** The top 10 sgRNA candidates are shown in descending order of candidates with perfect targetable sites. The actual count is shown above the bar graph. The two candidates used in this study were sgRNA-1 and sgRNA-3. We excluded sgRNA-2 because of the sequence similarity to sgRNA-1 (nearly identical sites would be targeted as there was only a one base difference of the spacer region) between the spacer sequence of the two sgRNAs.

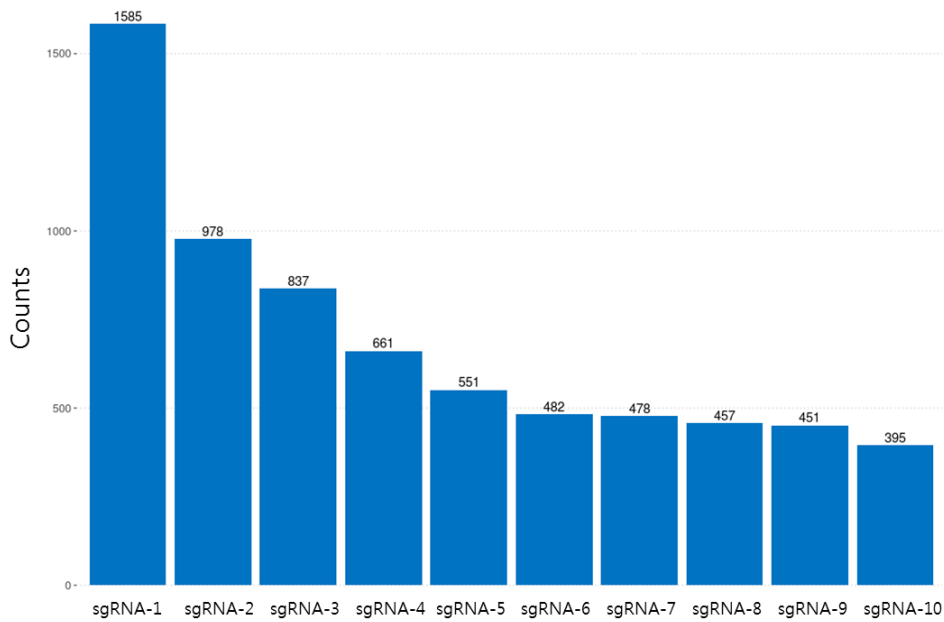

Supplementary Figure 4. Design of Targeted deaminase vector.

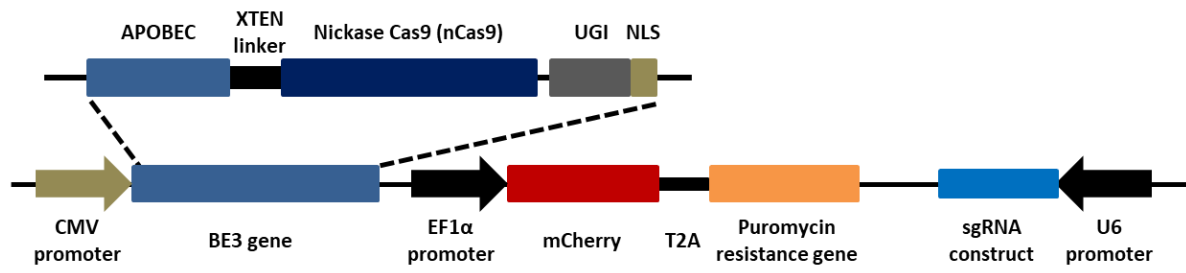

**Supplementary Figure 5. Comparison of editing efficiency in the spacer region.** All the ‘C’ positions (second to sixth) in non-target Cs in the spacer region showed little or no detectable editing compared to the known target region (4-8 positions from the PAM distal end). The first ‘C’ is located at the 8th position of the spacer region for the sgRNA-1 design (**Supplementary Figure 2**). Mutated C’s are underlined and Non-mutated C’s are indicated inside the plotting box. sgRNA-1 sequence is shown below with the C’s indicated in the bold with corresponding order in bracket from the left.

[sgRNA-1 : 5’-ATGGGTG **C(1)** AG **C(2)** AAA **C(3)** **C(4)** A **C(5)** **C(6)** A-3’]

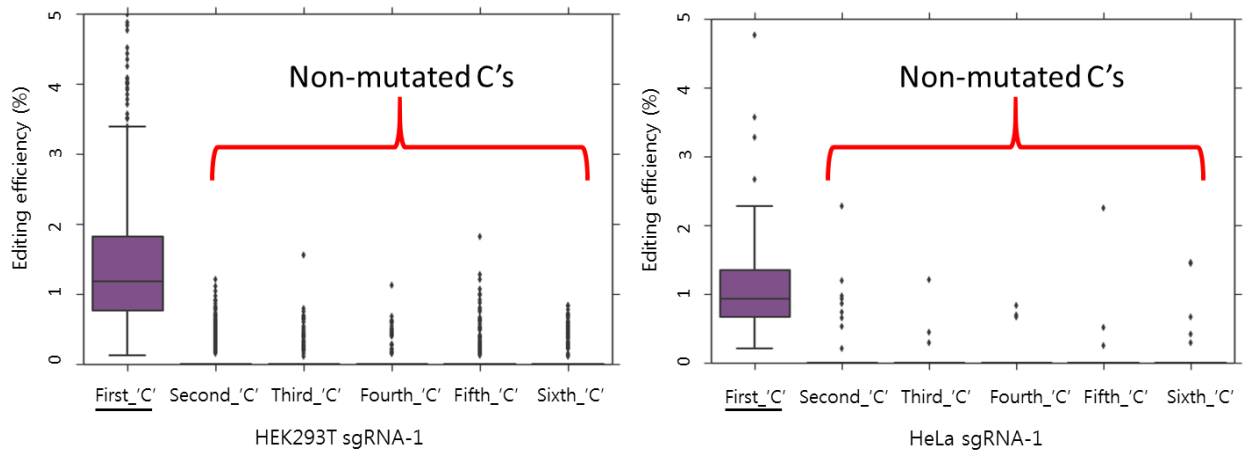

**Supplementary Figure 6. Schematic overview of *in vitro* tree expansion in the bulk experiment.**

First, the barcoding system containing BE3 and sgRNA is transduced into cells using lentivirus and selected using puromycin. Single cells are isolated from mCherry-expressing cells in individual wells using FACS. Isolated positive cells are expanded for 2–3 weeks, leveraging a mosaic effect rather than making a homogeneous population. This facilitates reconstruction of the lineage with minimal loss of accuracy. Some of the expanded cells are used for gDNA extraction and barcode amplification. Each cell barcode is then detected at the population level using NGS. The rest of the expanded cells are subjected for isolation of single cells using FACS, and these are expanded as in the previous procedure. The process is repeated over several generations, and cell barcodes are continually detected during this process. Reconstruction of the cell lineage is performed using the obtained cell barcodes.

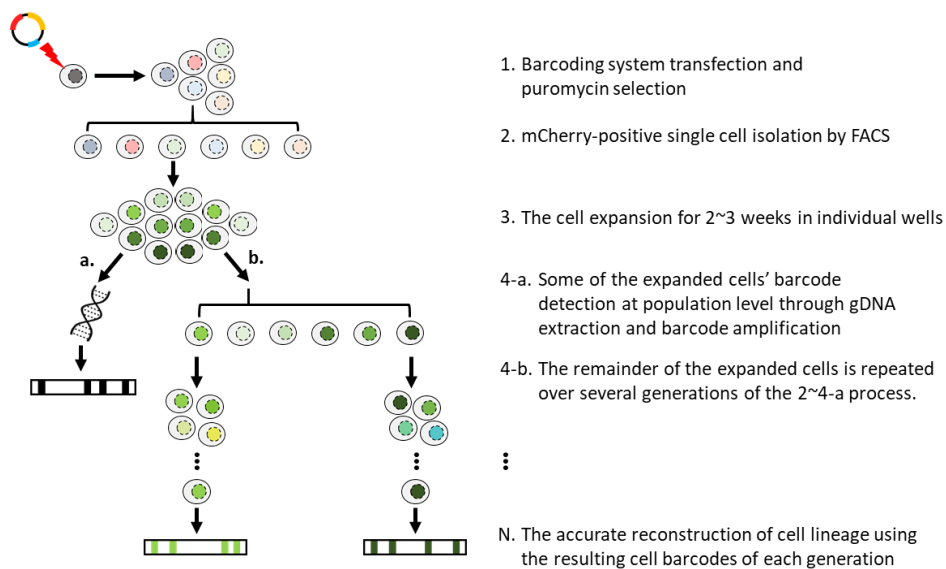

**Supplementary Figure 7. In vitro tree expansion experiment for the HeLa cell line.** The four major clades for sgRNA-3 are colored differently (3-1, 3-3, 3-6, 3-8). Subsequent child nodes from the parent nodes are colored with respect to the major clade. The misplaced nodes are represented by a red arrow. The red solid line connects the incorrectly placed mother-daughter node, and the dotted line indicates the correct mother-daughter node connection.

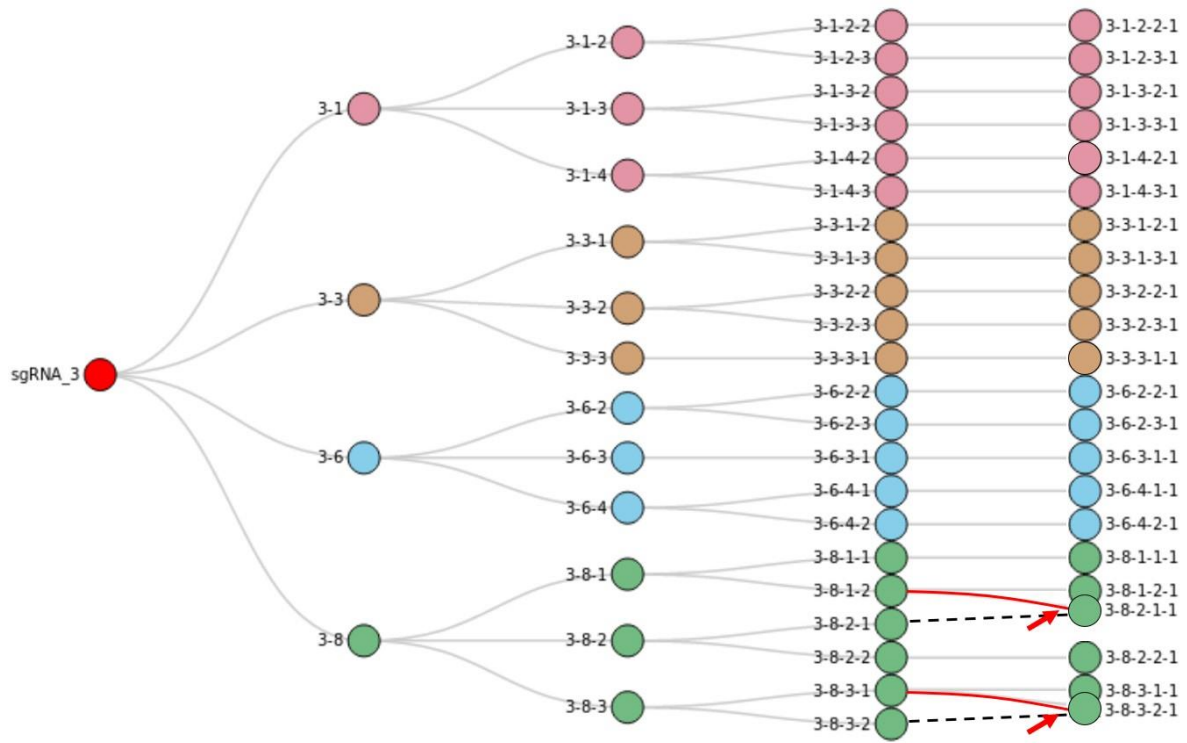



**Supplementary Figure 8. Barcode representation of in vitro bulk cell experiments (from top, HEK293T and HeLa cells).** Rows correspond to nodes for each clade. The clade to which each row (node) belongs is shown to the left; node numbers shown in **Figure 2** and **Supplementary Figure 7** are shown to the right for each row. The “depth” of the tree is indicated by a color gradient (lighter shades correspond to deeper tree nodes in **Figure 2b** and **Supplementary Figure 7**, and node numbers shown in red font indicate misplaced nodes). Columns correspond to editing sites in the sgRNA-3 design. Boxes shown in black dotted lines indicate cell barcodes from misplaced nodes.

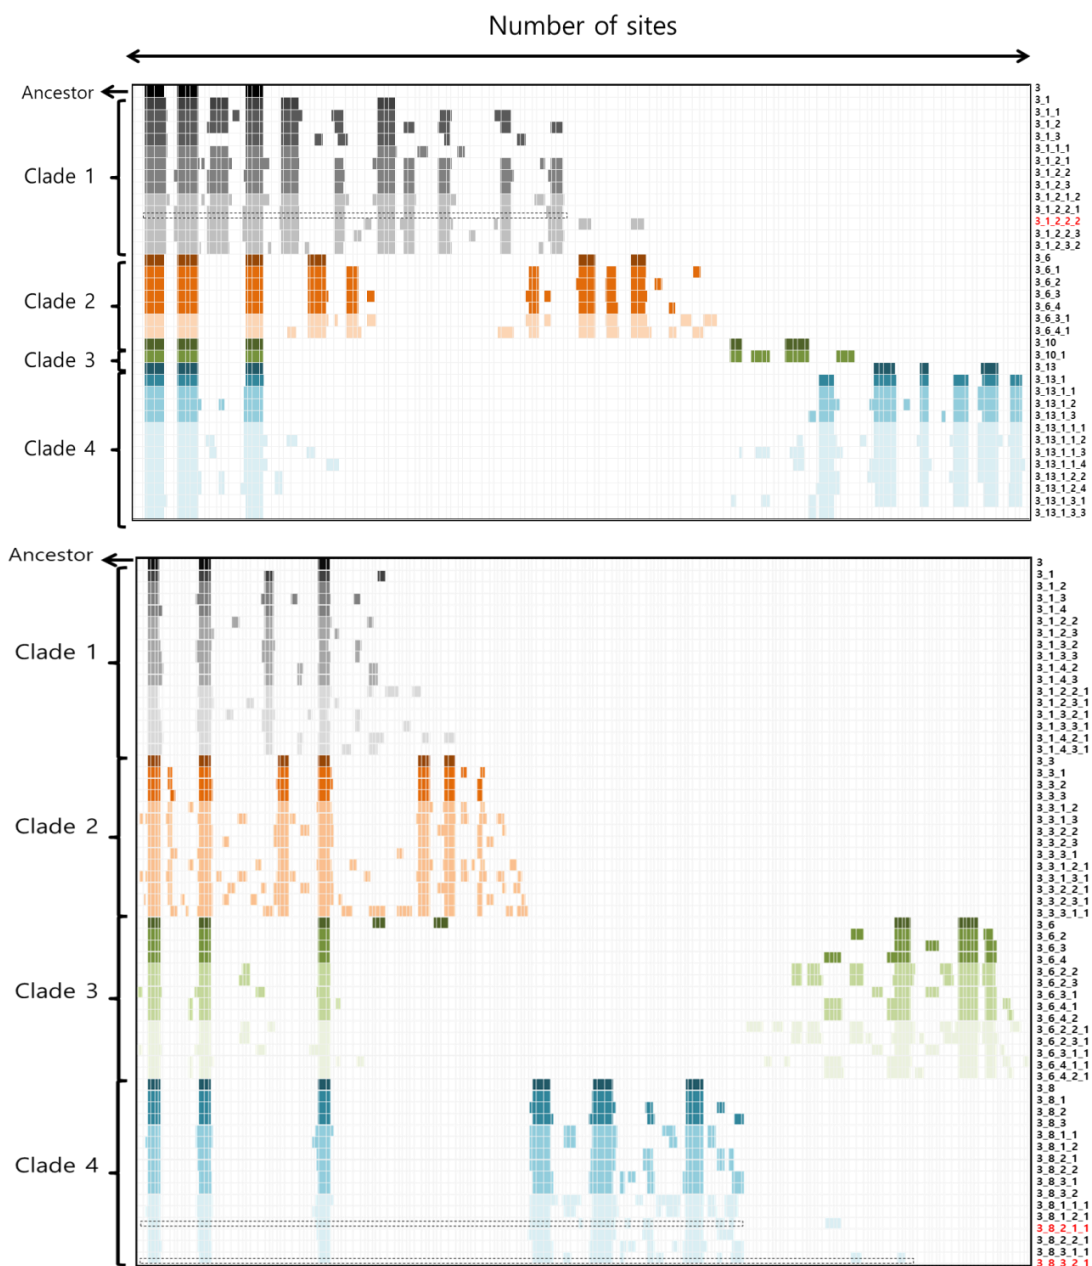

**Supplementary Figure 9. Comparison of the sequencing coverage statistics between the PCR and WGA results.** Lorenz plot of the single-cell sequencing library (sgRNA-3) preparation. A single-cell was picked and either PCR amplified or subjected to WGA before library preparation for sequencing. The grey dotted line ( $y=x$ ) represents perfect uniformity of coverage.

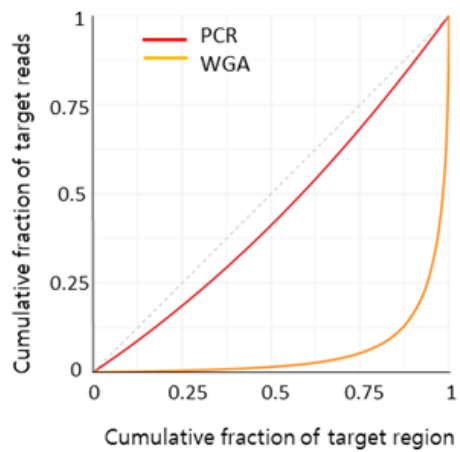

**Supplementary Figure 10. An experimental expansion of single-cell video tracking.** Two additional single-cell trees (sgRNA-3) are shown below. Two major clades are shown for each tree (different branch colors for different major clades). For the right tree, Cell\_1\_1\_1\_1 could not be placed correctly due to marker dropout (zero cell barcode).

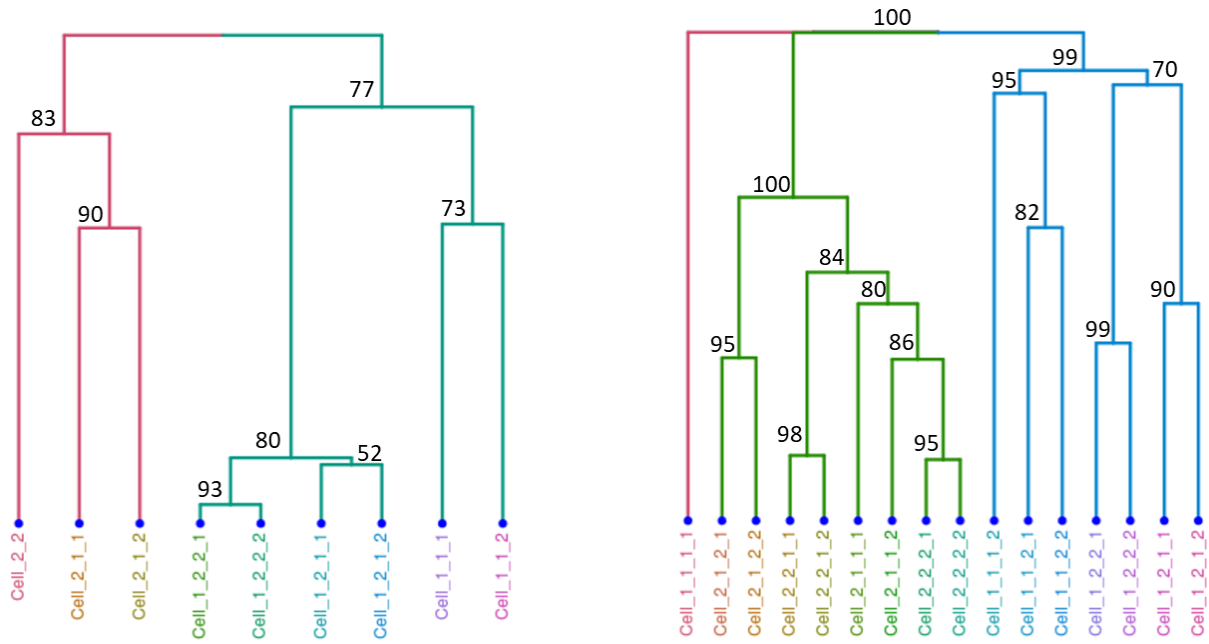

**Supplementary Figure 11. Editing dynamics of sgRNA-3 measured at different time points in HEK293T cells.** To estimate the editing rate, the curve was fitted (exponential function) using the average value of the two replicates.

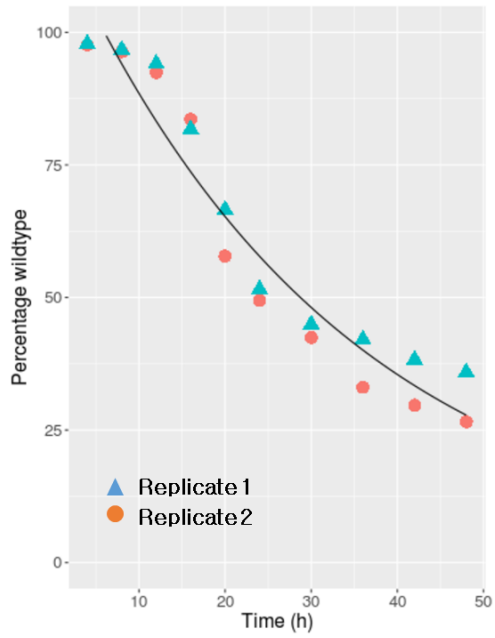

**Supplementary Figure 12. Simulated tree reconstruction using sgRNA-3 with different parameters.** Performance was evaluated by *in silico* experiments using the Cophenetic Correlation with replicates (error bars indicate standard deviation, n=10)

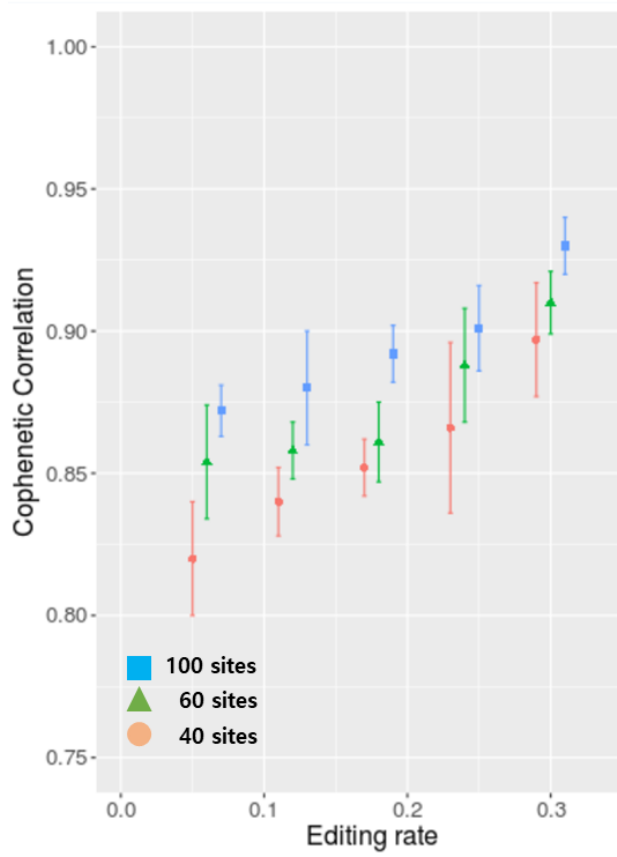

**Supplementary Figure 13. Simulation of site editing bias (N=800).** The site editing bias is simulated with 800 targets for comparison with an sgRNA-3 design (837 sites). We applied an empirically determined upper bound of the editing bias = 10% (~10% of the sites tend to saturate faster).

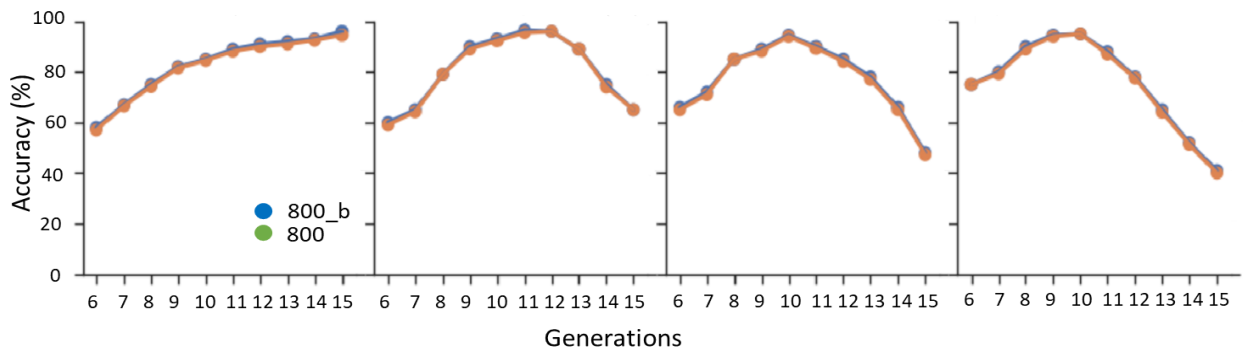

## Supplementary Tables

**Supplementary Table 1. Oligonucleotide used for plasmid vector construction.**

| <b>Primers</b>                   | <b>Sequences (5' to 3')</b>                                                      |
|----------------------------------|----------------------------------------------------------------------------------|
| <b>L1 site for</b>               | <b>ACACTCTTTCCCTACACGACGCTCTTCCGATCTNNNNNNNNNNNNNNNNNACACAGGGA<br/>GGGGAACAT</b> |
| <b>L1 site rev</b>               | <b>GACTGGAGTTCAGACGTGTGCTCTTCCGATCTTGCCATGGTGGTTTGCT</b>                         |
| <b>sgRNA-1<br/>sgRNA for</b>     | <b>TTTCTTGGCTTTATATATCTTGTGGAAAGGACGAAACACCGATGGGTGCAGCAAACCA<br/>CCA</b>        |
| <b>sgRNA-1<br/>sgRNA<br/>rev</b> | <b>GACTAGCCTTATTTTAACTTGCTATTTCTAGCTCTAAAACCTGGTGGTTTGCTGCACCC<br/>ATC</b>       |
| <b>sgRNA-3<br/>sgRNA for</b>     | <b>TTTCTTGGCTTTATATATCTTGTGGAAAGGACGAAACACCGGAAATACCTAATGTAGA<br/>TGA</b>        |
| <b>sgRNA-3<br/>sgRNA<br/>rev</b> | <b>GACTAGCCTTATTTTAACTTGCTATTTCTAGCTCTAAAACCTCATCTACATTAGGTATT<br/>TCC</b>       |

**Supplementary Table 2. Summary of coverage statistics.** Summary statistics of sgRNA designs used in the study for the bulk cell line experiment. Vehicle control refers to empty gRNA expression vectors. The average breadth of coverage (>20×) for base ‘C’ in the target region was ~96% for HEK293T and ~100% for the HeLa cell experiments.

| Sample ID       | Ontarget (%) | Breadth of coverage (%) |         |         |         |
|-----------------|--------------|-------------------------|---------|---------|---------|
|                 |              | 1X                      | 5X      | 10X     | 20X     |
| HEK293T_vehicle | 100          | 87.9937                 | 85.5214 | 84.1119 | 81.5152 |
| HEK293T_sgRNA-1 | 99.8645      | 87.9187                 | 85.4802 | 84.0915 | 81.304  |
| HEK293T_sgRNA-3 | 99.8771      | 88.1069                 | 85.5644 | 84.266  | 81.7976 |
| HeLa_vehicle    | 99.8283      | 85.7387                 | 81.8852 | 78.7776 | 77.7832 |
| HeLa_sgRNA-1    | 99.7969      | 86.4339                 | 83.1277 | 80.7696 | 76.41   |
| HeLa_sgRNA-3    | 99.8139      | 85.1579                 | 80.8516 | 77.4631 | 76.5252 |



## Supplementary Note

Supplementary Note. Sequence of Targeted deaminase vector.

```
ACTTACGGTAAATGGCCCCGCTGGCTGACCGCCCAACGACCCCCGCCCATTGACGTCAATAATGACGT
ATGTTCCCATAGTAACGCCAATAGGGACTTTCCATTGACGTCAATGGGTGGAGTATTTACGGTAAACT
GCCCACTTGGCAGTACATCAAGTGTATCATATGCCAAGTACGCCCCCTATTGACGTCAATGACGGTAA
ATGGCCCCGCTGGCATTATGCCCAGTACATGACCTTATGGGACTTTCTACTTGGCAGTACATCTACG
TATTAGTCATCGCTATTACCATGGTGATGCGGTTTTGGCAGTACATCAATGGGCGTGGATAGCGGTTT
GACTCACGGGGATTTCCAAGTCTCCACCCCATTGACGTCAATGGGAGTTTGTTTTGGCACCAAATCA
ACGGGACTTTTCCAAAATGTGCTAACAACCTCCGCCCATTGACGCAAATGGGCGGTAGGCGTGTACGGT
GGGAGTCTATATAAGCAGAGCTGGTTTTAGTGAACCGTCAGATCGCTAGAGATCCGCGGCCGCTAAT
ACGACTCACTATAGGGAGAGCCGCCACCATGAGCTCAGAGACTGGCCAGTGGCTGTGGACCCACAT
TGAGACGGCGGATCGAGCCCCATGAGTTTGAGGTATTCTTCGATCCGAGAGAGCTCCGCAAGGAGACC
TGCCTGCTTTACGAAATTAATTGGGGGGCCGGCACTCCATTTGGCGACATACATCACAGAACACTAA
CAAGCACGTCGAAGTCAACTTCATCGAGAAGTTCACGACAGAAAGATATTTCTGTCCGAACACAAGGT
GCAGCATTACCTGGTTTTCTCAGCTGGAGCCCATGCGGCGAATGTAGTAGGGCCATCACTGAATTCCTG
TCAAGGTATCCCACGTCCTCTGTTTTATTTACATCGCAAGGCTGTACCACCACGCTGACCCCCGCAA
TCGACAAGGCCTGCGGGATTTGATCTCTTCAGGTGTGACTATCCAAATTATGACTGAGCAGGAGTCAG
GATACTGCTGGAGAACTTTGTGAATTATAGCCCGAGTAATGAAGCCCACTGGCCTAGGTATCCCCAT
CTGTGGGTACGACTGTACGTTCTTGAAGTGTACTGCATCATACTGGGCTGCCTCCTTGTCTCAACAT
TCTGAGAAGGAAGCAGCCACAGCTGACATTCTTTACCATCGTCTTTCAGTCTTGTCAATTACCAGCGAC
TGCCCCACACATTTCTCTGGGCCACCGGGTTGAAAAGCGGCAGCGAGACTCCCGGGACCTCAGAGTCC
GCCACACCCGAAAAGTGATAAAAAGTATTCTATTGGTTTTAGCCATCGGCACATAATTCCGTTGGATGGGC
TGTCATAACCGATGAATACAAAGTACCTTCAAAGAAATTTAAGGTGTTGGGGAACACAGACCGTCATT
CGATTA AAAAGAATCTTATCGGTGCCCTCCTATTCGATAGTGGCGAAACGGCAGAGGCGACTCGCCTG
AAACGAACCGCTCGGAGAAGGTATACACGTCGCAAGAACC GAATATGTTACTTACAAGAAATTTTTAG
CAATGAGATGGCCAAAGTTGACGATTCTTTCTTTACCGTTTGGAAAGATCCTTCTTGTGCAAGAGG
ACAAGAAACATGAACGGCACCCCATCTTTGGAAACATAGTAGATGAGGTGGCATATCATGAAAAGTAC
CCAACGATTTATCACCTCAGAAAAAAGCTAGTTGACTCAACTGATAAAGCGGACCTGAGGTTAATCTA
CTTGGCTCTTGCCCATATGATAAAGTTCCGTGGGCACCTTCTCATTGAGGGTGATCTAAATCCGGACA
ACTCGGATGTGACAAACTGTTTCATCCAGTTAGTACAAACCTATAATCAGTTGTTTTGAAGAGAACCCT
ATAAATGCAAGTGGCGTGGATGCGAAGGCTATTCTTAGCGCCGCCTCTCTAAATCCCGACGGCTAGA
AAACCTGATCGCACAAATTACCCGGAGAGAAGAAAATGGGTTGTTCCGGTAACCTTATAGCGCTCTCAC
TAGGCCTGACACCAAATTTTAAGTCGAACTTCGACTTAGCTGAAGATGCCAAATTCGAGCTTAGTAAG
GACACGTACGATGACGATCTCGACAATCTACTGGCACAAATTTGGAGATCAGTATGCGGACTTATTTTT
GGCTGCCAAAACCTTAGCGATGCAATCCTCCTATCTGACATACTGAGAGTTAATACTGAGATTACCA
AGGCGCCGTTATCCGCTTCAATGATCAAAGGTACGATGAACATCACCAAGACTTGACACTTCTCAAG
GCCCTAGTCCGTGAGCAACTGCCTGAGAAAATATAAGGAAAATATTCTTTGATCAGTCGAAAAACGGGTA
CGCAGGTTATATTGACGGCGGAGCGAGTCAAGAGGAATTTCTACAAGTTTATCAAACCCATATTAGAGA
AGATGGATGGGACGGAAGAGTTGCTTGTA AAAC TCAATCGCGAAGATCTACTGCGAAAGCAGCGGACT
TTCGACAACGGTAGCATTCCACATCAAATCCACTTAGGCGAATTGCATGCTATACTTAGAAGGCAGGA
GGATTTTTATCCGTTCTCAAAGACAATCGTGAAAAGATTGAGAAAATCCTAACCTTTCGCATACCTT
ACTATGTGGGACCCCTGGCCGAGGGAACCTCGGTTTCGCATGGATGACAAGAAAGTCCGAAGAAACG
ATTACTCCATGGAATTTTGAGGAAGTTGTGATAAAGGTGCGTCAGCTCAATCGTTTCATCGAGAGGAT
GACCAACTTTGACAAGAATTTACCGAACGAAAAAGTATTGCCCTAAGCACAGTTTACTTTACGAGTATT
```

TCACAGTGTACAATGAACTCACGAAAGTTAAGTATGTCACTGAGGGCATGCGTAAACCCGCCTTTCTA  
AGCGGAGAACAGAAGAAAGCAATAGTAGATCTGTTATTCAAGACCAACCGCAAAGTGACAGTTAAGCA  
ATTGAAAGAGGACTACTTTAAGAAAATTGAATGCTTCGATTCGTGCGAGATCTCCGGGGTAGAAGATC  
GATTTAATGCGTCACCTGGTACGTATCATGACCTCCTAAAGATAATTAAAGATAAGGACTTCCTGGAT  
AACGAAGAGAATGAAGATATCTTAGAAGATATAGTGTGACTCTTACCCTCTTTGAAGATCGGGAAAT  
GATTGAGGAAAGACTAAAAACATACGCTCACCTGTTGACGATAAGGTTATGAAACAGTTAAAGAGGC  
GTCGCTATACGGGCTGGGGACGATTGTGCGGAAACTTATCAACGGGATAAGAGACAAGCAAAGTGGT  
AAAAC TATTCTCGATTTTCTAAAGAGCGACGGCTTCGCCAATAGGAACTTTATGCAGCTGATCCATGA  
TGACTCTTTAACCTTCAAAGAGGATATACAAAAGGCACAGGTTTCCGGACAAGGGGACTCATTGCACG  
AACATATTGCGAATCTTGCTGGTTCGCCAGCCATCAAAAAGGGCATACTCCAGACAGTCAAAGTAGTG  
GATGAGCTAGTTAAGGTCATGGGACGTCAAAACCGGAAAACATTGTAATCGAGATGGCACGCGAAAA  
TCAAACGACTCAGAAGGGGCAAAAAACAGTCGAGAGCGGATGAAGAGAAATAGAAGAGGGTATTAAAG  
AACTGGGCAGCCAGATCTTAAAGGAGCATCCTGTGGAAAATACCCAATTGCAGAACGAGAACTTTAC  
CTCTATTACCTACAAAATGGAAGGGACATGTATGTTGATCAGGAACTGGACATAAACCGTTTTATCTGA  
TTACGACGTCGATCACATTGTACCCCAATCCTTTTTGAAGGACGATTCAATCGACAATAAAGTGCTTA  
CACGCTCGGATAAGAACCAGGGGAAAAGTGACAATGTTCCAAGCGAGGAAGTCGTAAAGAAAATGAAG  
AACTATTGGCGGCAGCTCCTAAATGCGAAACTGATAACGCAAAGAAAGTTCGATAACTTAACTAAAGC  
TGAGAGGGGTGGCTTGTCTGAACTTGACAAGGCCGATTTATTAAACGTCAGCTCGTGAAACCCGCC  
AAATCACAAAGCATGTTGCACAGATACTAGATTCCCGAATGAATACGAAATACGACGAGAACGATAAG  
CTGATTCGGGAAGTCAAAGTAATCACTTTAAAGTCAAATTTGGTGTGCGGACTTCAGAAAGGATTTTCA  
ATTC TATAAAGTTAGGGAGATAAATAACTACCACCATGCGCACGACGCTTATCTTAATGCCGTCGTA  
GGACCGCACTCATTAAGAAAATACCCGAAGCTAGAAAGTGAGTTTGTGTATGGTGATTACAAAGTTTAT  
GACGTCGGTAAGATGATCGCGAAAAGCGAACAGGAGATAGGCAAGGCTACAGCCAAATAC TTCTTTTA  
TTCTAACATTATGAATTTCTTTAAGACGGAAATCACTCTGGCAAACGGAGAGATACGCAAACGACCTT  
TAATTGAAACCAATGGGGAGACAGGTGAAATCGTATGGGATAAGGGCCGGGACTTCGCGACGGTGAGA  
AAAGTTTTGTCCATGCCCAAGTCAACATAGTAAAGAAAAC TGAGGTGCAGACCCGGAGGGTTTTCAA  
GGAATCGATTTCCAAAAAGGAATAGTGATAAGCTCATCGCTCGTAAAAAGGACTGGGACCCGAAAA  
AGTACGGTGGCTTCGATAGCCCTACAGTTGCC TATTCTGTCC TAGTAGTGGA AAAAGTTGAGAAGGGA  
AAATCCAAGAACTGAAGTCAGTCAAAGAATTATTGGGGATAACGATTATGGAGCGCTCGTCTTTTGA  
AAAGAACCCCATCGACTTCCTTGAGGCGAAAAGTTACAAGGAAGTAAAAAGGATCTCATAATTAAC  
TACCAAAGTATAGTCTGTTTGAGTTAGAAAATGGCCGAAAACGGATGTTGGCTAGCGCCGGAGAGCTT  
CAAAGGGGAAACGAACTCGCACTACCGTCTAAATACGTGAATTTCTGTATTTAGCGTCCATTACGA  
GAAGTTGAAAGGTTACCTGAAGATAACGAACAGAAGCAACTTTTTGTTGAGCAGCACAAACATTATC  
TCGACGAAATCATAGAGCAAATTTCGGAATTCAGTAAGAGAGTCATCCTAGCTGATGCCAATCTGGAC  
AAAGTATTAAGCGCATAACAAGCACAGGGATAAACCCATACGTGAGCAGGCGGAAAATATTATCCA  
TTTGTTTACTCTTACCAACCTCGGCGCTCCAGCCGATTCAAGTATTTTGACACAACGATAGATCGCA  
AACGATACACTTCTACCAAGGAGGTGCTAGACGCGACACTGATTACCAATCCATCACGGGATTATAT  
GAAACTCGGATAGATTTGTACAGCTTGGGGGTGACTCTGGTGGTTCTACTAATCTGTCAGATATTAT  
TGAAAAGGAGACCGGTAAGCAACTGGTTATCCAGGAATCCATCCTCATGCTCCAGAGGAGGTGGAAG  
AAGTCATTGGGAACAAGCCGGAAAGCGATATACTCGTGACACCCGCTACGACGAGAGCACCGACGAG  
AATGTCATGCTTCTGACTAGCGACGCCCTGAATACAAGCCTTGGGCTCTGGTCATACAGGATAGCAA  
CGGTGAGAACAAGATTAAGATGCTCTCTGGTGGTTCTCCCAAGAAGAAGAGGAAAGTCTAA CAGCAGA  
GATCCAGTTTATCGATGAGTAATTCATACAAAAGGACTCGCCCTGCCTTGGGGAATCCAGGGACCG  
TCGTTAAACTCCCACTAACGTAGAACCAGAGATCGCTGCGTTCCCGCCCTCACCCGCCGCTCTC  
GTCATCACTGAGGTGGAGAAGAGCATGCGTGAGGCTCCGGTGCCCGTCAGTGGGCAGAGCGCACATCG  
CCCACAGTCCCGAGAAGTTGGGGGGAGGGGTCCGGCAATTGAACCGGTGCC TAGAGAAGGTGGCGCGG  
GGTAAACTGGGAAAGTGATGTCGTACTGGCTCCGCTTTTTCCCGAGGTTGGGGGAGAACC GTATA

TAAAGTGCAGTAGTCGCCGTGAACGTTCTTTTTTCGCAACGGGTTTGCCGCCAGAACACAGGTAAGTGCC  
GTGTGTGGTTCCCGCGGGCCTGGCCTCTTTACGGGTTATGGCCCTTGCGTGCCTTGAATTACTTCCAC  
GCCCCGGCTGCAGTACGTGATTCCTTGATCCCGAGCTTCGGGTTGGAAGTGGGTGGGAGAGTTCGAGG  
CCTTGCGCTTAAGGAGCCCTTCGCCTCGTGCTTGAGTTGAGGCCTGGCTTGGGCGCTGGGGCCGCCG  
CGTGCGAATCTGGTGGCACCTTCGCGCCTGTCTCGCTGCTTTCGATAAGTCTCTAGCCATTTAAAATT  
TTTTGATGACCTGCTGCGACGCTTTTTTTTCTGGCAAGATAGTCTTGTAATGCGGGCCAAGATCTGCAC  
ACTGGTATTTTCGGTTTTTTGGGGCCGCGGGCGCGACGGGGCCCGTGCCTCCAGCGCACATGTTCCGGC  
GAGGCGGGGCTGCGAGCGCGGCCACCGAGAATCGGACGGGGTAGTCTCAAGCTGGCCGGCCTGCTC  
TGGTGCCTGGCCTCGCGCCCGCGTGTATCGCCCGCCCTGGGCGGCAAGGCTGGCCCGGTCCGGACCA  
GTTGCGTGAAGGAAAGATGGCCGCTTCCCGCCCTGCTGCAGGAGCTCAAATGGAGGACGCGGGC  
CTCGGGAGAGCGGGCGGGTGAATCACCACACAAAGGAAAAGGGCCTTTCGGTCTCAGCCGTGCTT  
CATGTGACTCCACGGAGTACCGGGCGCCGTCCAGGCACCTCGATTAGTTCTCGAGCTTTTGGAGTACG  
TCGTCTTTAGGTTGGGGGAGGGTTTTATGCGATGGAGTTTCCCCACACTGAGTGGGTGGAGACTGA  
AGTTAGGCCAGCTTGGCACTGATGTAATCTCCTTGGAAATTTGCCCTTTTGGAGTTTGGATCTTGGT  
TCATTCCTCAAGCTCAGACAGTGGTTCAAAGTTTTTTTTCTTCCATTTAGGTGTCTGAGGATCTATT  
TCCGGTGAATTCTCAGACTAGTTCAGATGGTGAGCAAGGGCGAGGAGGATAACATGGCCATCATC  
AAGGAGTTCATGCGCTTCAAGGTGCACATGGAGGGCTCCGTGAACGGCCACGAGTTCGAGATCGAGGG  
CGAGGGCGAGGGCCGCCCTACGAGGGCACCCAGACCGCCAAGCTGAAGGTGACCAAGGTTGGCCCC  
TGCCCTTCGCTGGGACATCCTGTCCCCTCAGTTCATGTACGGCTCCAAGGCCTACGTGAAGCACCCC  
GCCGACATCCCCGACTACTTGAAGCTGTCTTCCCCGAGGGCTTCAAGTGGGAGCGCGTGAAGACTT  
CGAGGACGGCGCGTGGTGACCGTGACCCAGGACTCCTCCCTGCAGGACGGCGAGTTCATCTACAAGG  
TGAAGCTGCGCGGCACCAACTTCCCCTCCGACGGCCCCGTAATGCAGAAGAAGACCATGGGCTGGGAG  
GCCTCCTCCGAGCGGATGTACCCCGAGGACGGCGCCCTGAAGGGCGAGATCAAGCAGAGGCTGAAGCT  
GAAGGACGGCGGCCACTACGACGCTGAGGTCAAGACCACCTACAAGGCCAAGAAGCCCCTGCAGCTGC  
CCGGCGCCTACAACGTCAACATCAAGTTGGACATCACCTCCCACAACGAGGACTACACCATCGTGGAA  
CAGTACGAACCGCGCCGAGGGCCGCACTCCACCGCGGCATGGACGAGCTGTACAAGGAGGGCCGGGG  
CAGCCTGCTGACCTGCGGGCAGCTGGAGGAGAACCCCGGCCCATGACCGAGTACAAGCCCACGGTGC  
GCCTCGCCACCCGCGACGACGTCCCCAGGGCCGTACGCACCTCGCCCGCGGTTCCGGGACTACCCC  
GCCACGCGCCACACCGTCGATCCGGACCGCCACATCGAGCGGGTACCGAGCTGCAAGAACTCTTCTT  
CACGCGCGTCCGGCTCGACATCGGCAAGGTGTGGGTCCGGACGACGGCGCCGCGGTGGCGGTCTGGA  
CCACGCCGGAGAGCGTCAAGCGGGGGCGGTGTTCCGCCGAGATCGGCCCGCGCATGGCCGAGTTGAGC  
GGTCCC GGCTGGCCGCGCAGCAACAGATGGAAGGCCTCCTGGCGCCGACCGGCCAAGGAGCCCGC  
GTGGTTCCTGGCCACCGTCCGGCTCTCGCCCCGACCACCAGGGCAAGGGTCTGGGCGAGCCCGTCTGTC  
TCCCCGGAGTGGAGGCGCGGAGCGCGCCGGGTGCCCGCTTCTGGAGACCTCCGCGCCCCGCAAC  
CTCCCCTTCTACGAGCGGCTCGGCTTACCCTCACCGCCGACGTCGAGGTGCCCGAAGGACCGCGCAC  
CTGGTGCATGACCCGCAAGCCCGTGCCTGAACGCGTTAAGTACCCAGCTTTCTTGTACAAAGTGGT  
GATAACTCTAGAGAATCACTCCTCAGGTGCAGGCTGCCTATCAGAAGGTGGTGGCTGGTGTGGCCAA  
TGCCCTGGCTCACAAATACCACTGAGATCTTTTTCCCTCTGCCAAAAATTATGGGGACATCATGAAGC  
CCCTTGAGCATCTGACTTCTGGCTAATAAAGGAAATTTATTTTCATTGCAATAGTGTGTTGGAATTTT  
TTGTGTCTCTCACTCGGAAGGACATATGGGAGGGCAAATCATTTAAAACATCAGAATGAGTATTTGGT  
TTAGAGTTTGGCAACATATGCCATATGCTGGCTGCCATGAACAAAGGTGGCTATAAAGAGGTATCAG  
TATATGAAACAGCCCCCTGCTGTCCATTCTTATTCATAGAAAAGCCTTGACTTGAGGTTAGATTTT  
TTTTATATTTTGTTTTGTGTTATTTTTTTCTTTAACATCCCTAAAATTTTCTTACATGTTTTACTAG  
CCAGATTTTTTCTCCTCTCCTGACTACTCCCAGTCATAGCTGTCCCTCTTCTTATGAAGATCCCTC  
GACCTGCAGCCCAAAAAAAGCACCGACTCGGTGCCACTTTTTCAAGTTGATAACGGACTAGCCTTAT  
TTTAACCTTGCTATTTCTAGCTCTAAAACNNNNNNNNNNNNNNNNNNNNCGGTGTTTTCGTCTTTCCAC  
AAGATATATAAAGCCAAGAAATCGAAATACTTCAAGTTACGGTAAGCATATGATAGTCCATTTTAA

ACATAATTTTAAAAC TGCAAAC TACCCAAGAAATTATTACTTTCTACGTCACGTATTTTGTACTAATA  
TCTTTGTGTTTACAGTCAAATTAATTCTAATTATCTCTCTAACAGCCTTGTATCGTATATGCAAATAT  
GAAGGAATCATGGGAAATAGGCCCTCTTCCTGCCCGACCTT

CMV promoter

BE3 gene

EF1 $\alpha$  promoter

mCherry gene

Puromycin resistance gene

U6 promoter + sgRNA construct
